# Supplementary material for: Anti-biofouling effect of a thin film nanocomposite membrane with a functionalized-carbon-nanotube-blended polymeric support for the pressure-retarded osmosis process
Source: Royal Society of Chemistry journal article supplement (doi:10.1039/c9ra08870a), 2020-01-01
Supplement: c9ra08870a1.pdf [file c9ra08870a1.pdf]

1

2

## Supporting Information

3

4 **Anti-biofouling effect of a thin film nanocomposite membrane with a**  
5 **functionalized-carbon-nanotube-blended polymeric support for the**  
6 **pressure-retarded osmosis process.**

7

8

9

Yeji Kim<sup>a,b</sup>, Eunmok Yang<sup>a,b</sup>, Hosik Park<sup>\*b</sup> and Heechul Choi <sup>\*a,b</sup>

10

11 <sup>a</sup>School of Earth Science and Environmental Engineering, Gwangju Institute of Science and  
12 Technology (GIST), 123 Cheomdangwagi-ro, Buk-gu, Gwangju, 61005, South Korea

13 <sup>b</sup>Center for Membranes, Advanced Materials Division, Korea Research Institute of Chemical  
14 Technology (KRICT), Daejeon 34114, South Korea

15

16

17

Supporting Information for

18

*Chemosphere*

19

20

21 \* Corresponding author.

22 E-mail address: hcchoi@gist.ac.kr (H. Choi); Phone: 82-62-715-2441; Fax: 82-62-715-2423.

23 E-mail address: hspark@kRICT.re.kr (H. Park)

24

## 25 **Experimental**

### 26 **1. Functionalization of CNTs**

27 First, 0.5 g of pristine MWCNTs was refluxed with an acid solution of sulfuric acid and nitric  
28 acid (volume ratio of 3:1) at 100 °C for 3 h to remove impurities. Second, after reflux was  
29 completed, the solution was diluted with DI to attain pH 5–6. Then, the solution was  
30 subjected to centrifugation at 1500 rpm to neutralize the solution by discarding highly acidic  
31 water and adding DI water until neutral pH was attained. The diluted solution was filtered  
32 using Isopore membrane filters (0.2  $\mu\text{m}$  GTTP, Merck, Korea). The filtered solid was dried in a  
33 35°C isothermal-isohumidity chamber. After drying, MWCNTs were again immersed in the  
34 same acid mixture (3:1) and sonicated at 70 °C for 9 h for the attachment of hydrophilic  
35 functional groups. After oxidation, the acid solution was cooled and diluted with DI water  
36 (pH 5–6). The functionalized CNTs were filtered and dried in the 35°C isothermal-  
37 isohumidity chamber. The final functionalized CNTs were smashed into small particles to  
38 mix with the polymer.

39

### 40 **2. Membrane performance test**

41 Water flux and reverse salt flux were measured in the FO mode (AL-FS)/PRO mode (AL-DS) and  
42 calculated by the following equations.  $J_w$  is the water flux through the membrane.  $V_{F0}$  is the  
43 initial volume of the feed solution.  $V_F$  is the final volume of the feed solution after operation.  $A_m$   
44 is the effective membrane area.  $t$  is time.  $J_s$  is the reverse salt flux through the membrane.  $C_F$  is  
45 the final salt concentration of the feed solution after operation. The salt concentration of the  
46 feed solution was measured using an electrical conductivity meter (ES-71G, Horiba, Japan) for  
47 RSF calculation. The units of water flux and reverse salt flux are  $\text{Lm}^{-2}\text{h}^{-1}$  (LMH) and  $\text{gm}^{-2}\text{h}^{-1}$   
48 (gMH), respectively.

49

$$50 \quad J_w = \frac{V_{F0} - V_F}{A_m t}$$

51

52 
$$J_s = \frac{C_F V_F}{A_m t}$$

53

### 54 **3. Biofouling cleaning protocol**

55 A biofouling cleaning protocol for thorough cleaning after each biofouling experiment was  
56 developed. Several cleaning steps were carried out to remove trace organic impurities and  
57 microorganisms: (1) circulating 0.5% of sodium hypochlorite (NaOCl) for 8 h, (2) washing with DI  
58 water for 30 min, (3) removing trace organic matter using sodium dodecyl sulfate (SDS) for 4 h,  
59 and (4) washing again with DI for 30 min.

60

### 61 **4. Laser scanning confocal microscopy analysis of the biofouled membrane**

62 The morphology of a biofouled membrane surface after the biofouling test was observed by  
63 confocal laser scanning microscopy (CLSM, TCS SP2, Leica, Germany). The biofouled membrane  
64 was collected and cut to pieces for staining using a BacLight live/dead bacterial viability kit  
65 (Molecular Probes, USA). Bacteria cells were stained with a dye mixture solution of 1 mL of DI  
66 water with 3  $\mu$ L of SYTO9 and 3  $\mu$ L of PI for 20 min in a dark room. The colored membranes were  
67 rinsed using a PBS solution. SYTO9 was excited at 488 nm, and PI was excited at 559 nm.  
68 Fluorescence images revealed green and red spots, corresponding to live bacteria and dead  
69 bacteria, respectively.

70

71

72

73

74

75

76

77

78

79

80

81

82

83

84

## 85 Figures

86

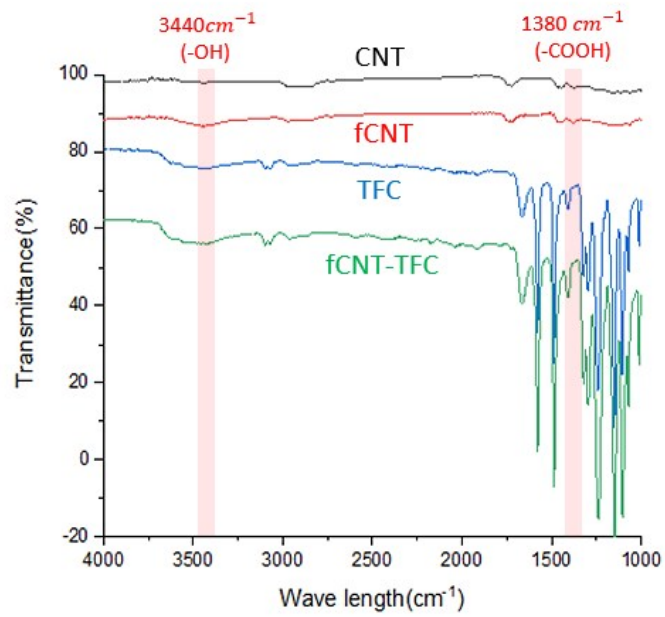

87

88

89 **Fig. S1** FTIR spectra of bare CNTs, oxide-functionalized CNTs (fCNT), bare support layer (TFC),  
90 fCNT-blended support layer (fCNT-TFN)

91

92

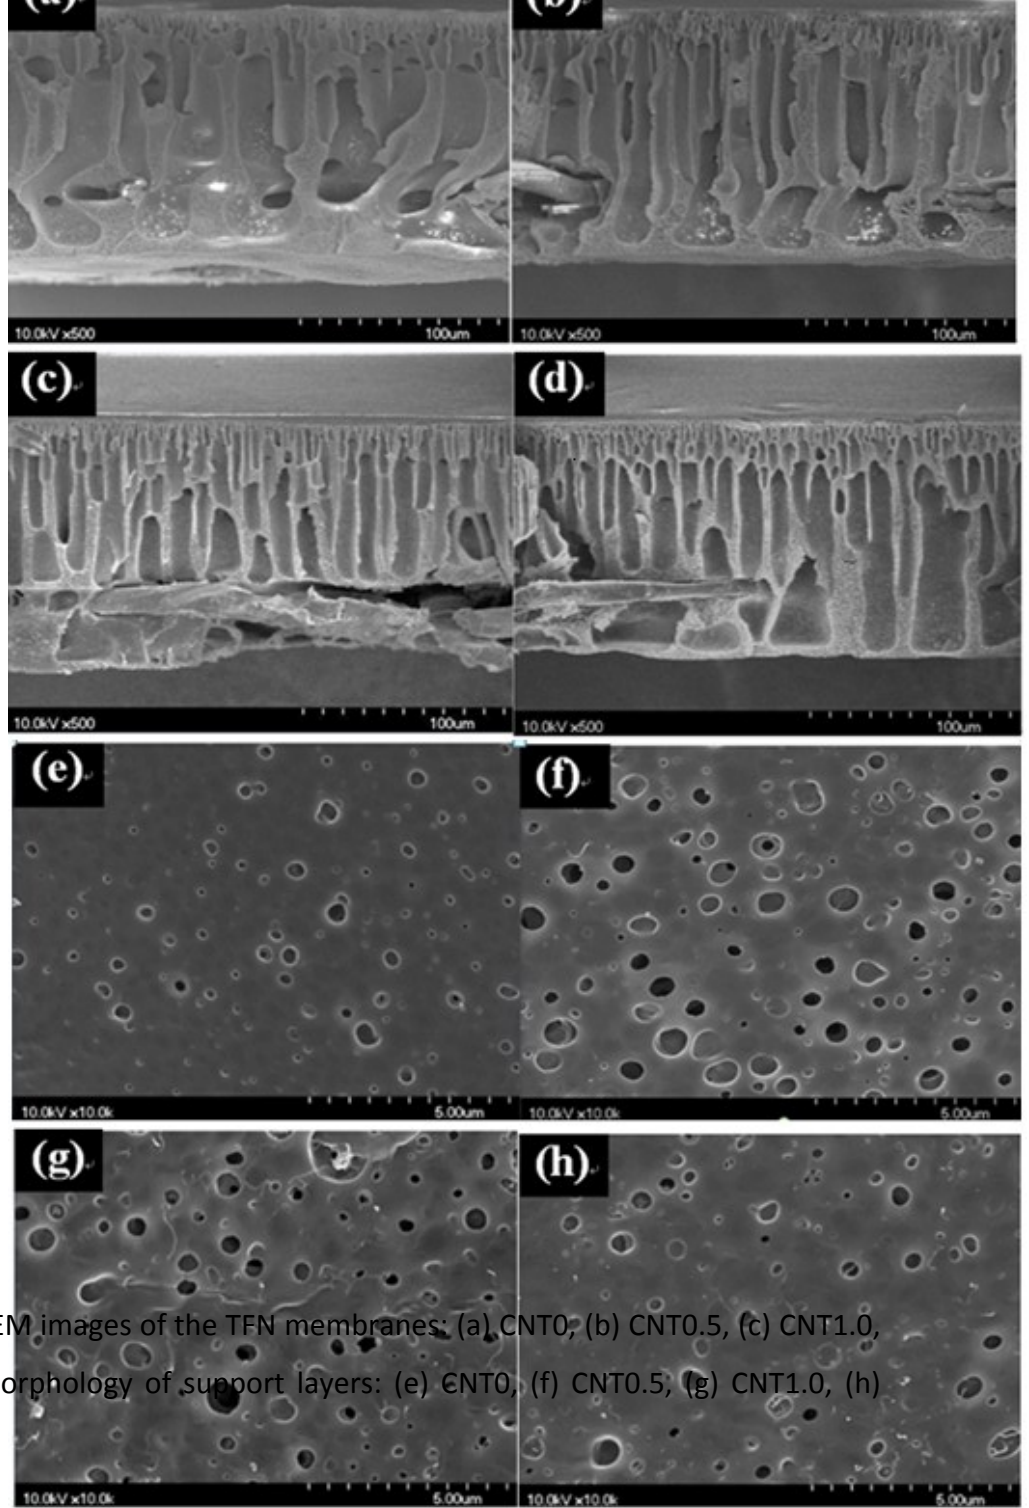

93  
94

95 **Fig. S2** Cross-sectional SEM images of the TFN membranes: (a) CNT0, (b) CNT0.5, (c) CNT1.0,  
96 (d) CNT2.0 as well as morphology of support layers: (e) CNT0, (f) CNT0.5, (g) CNT1.0, (h)  
97 CNT2.0

98

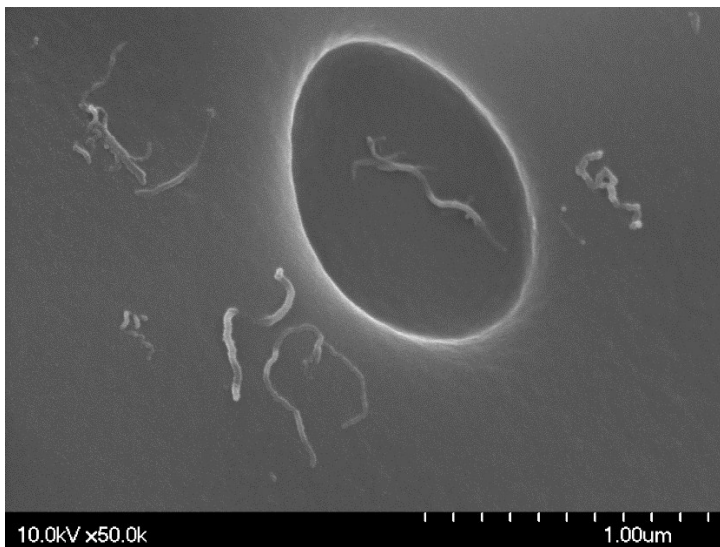

99

100 **Fig. S3** Deposition of fCNTs on the bottom surface of the fCNT-TFC0.5 support layer

101

102

103

104

105

106

107

108

109

110

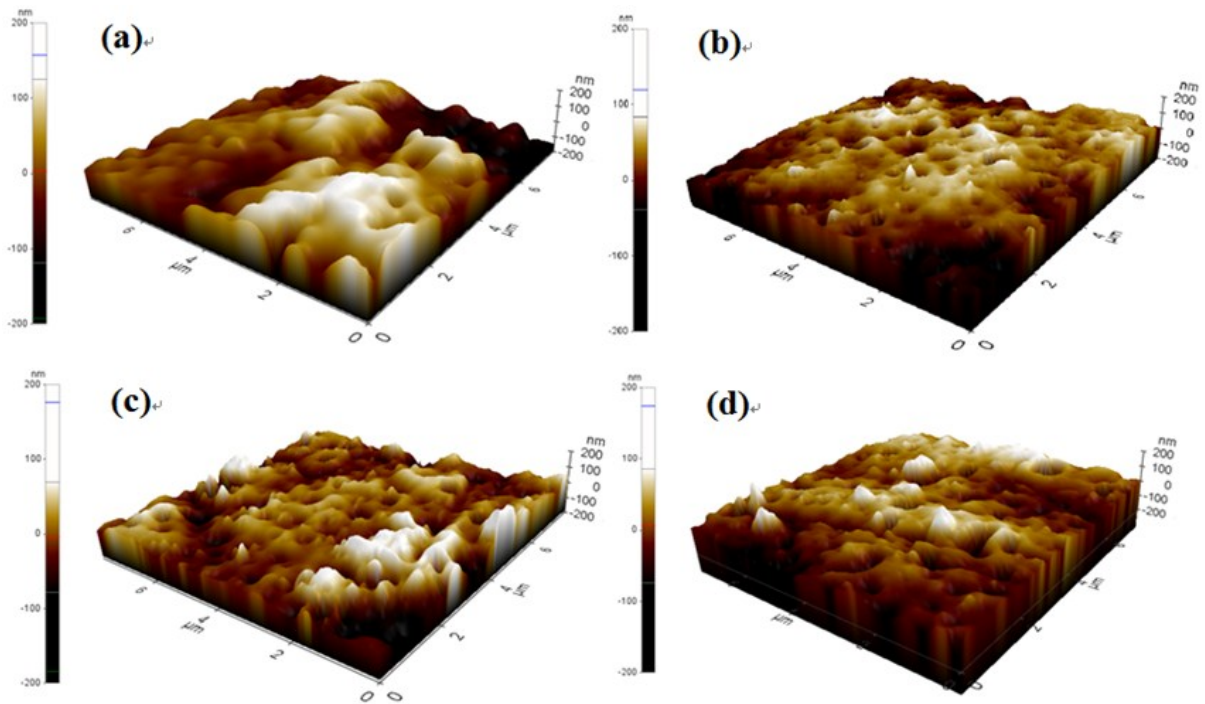

111

112 **Fig. S4** AFM images showing the support layer roughness of the fabricated TFN membranes:

113 (a) CNT0, (b) CNT0.5, (c) CNT1, (d) CNT2

114

115

116

117

118

119

120

121

122

123

124

125

126

127

128

129

130

131 **Table**

132 **Table S1** List of abbreviation

|   | Abbreviation | Definition                         |
|---|--------------|------------------------------------|
| 1 | TFN          | Thin film nanocomposite            |
| 2 | TFC          | Thin film composite                |
| 3 | PRO          | Pressure-retarded osmosis          |
| 4 | FO           | Forward osmosis                    |
| 5 | SEM          | Scanning electron microscopy       |
| 6 | AFM          | Atomic force microscopy            |
| 7 | FTIR         | Fourier transform infrared         |
| 8 | CLSM         | Confocal laser scanning microscopy |
| 9 | RSF          | Reverse salt flux                  |

133

134
